# Supplementary material for: Functional outcome of 2-D- and 3-D-guided corrective forearm osteotomies: a systematic review
Source: PubMed Central journal article supplement (PMC11264531; doi:10.1177/17531934231201962), 2023-09-25
Supplement: sj-pdf-3-jhs-10.1177_17531934231201962.pdf [file sj-pdf-3-jhs-10.1177_17531934231201962.pdf]

Online Table S2: Study characteristics. Quality was assessed by the McMaster criteria.

| Study                                              | Country         | Design             | N              | Period      | Outcome measurements           | 2D or 3D | Quality |
|----------------------------------------------------|-----------------|--------------------|----------------|-------------|--------------------------------|----------|---------|
| Aibinder et al. 2018 (Aibinder et al., 2018)       | NS              | Case control       | 11             | NS          | ROM, VAS                       | 2D       | 57%     |
| Andreasson et al. 2020 (Andreasson et al., 2020a)  | Sweden          | Case study         | 37             | 2007 – 2014 | PROMs, ROM, complications      | 2D       | 75%     |
| Andreasson et al. 2020 (Andreasson et al., 2020b)  | Sweden          | RCT                | 38             | 2014–2018   | PROMs, ROM, complications      | 2D       | 94%     |
| Athlani et al. 2020 (Athlani et al., 2020)         | France          | Cohort study       | 16             | 2016 – 2019 | PROMs, VAS, complications      | 3D       | 67%     |
| Bauer et al. 2017 (Bauer et al., 2017)             | Switzerland     | Case control study | 31 2D<br>25 3D | 2003 – 2015 | ROM, complications             | Both     | 71%     |
| Bhatia et al. 2022 (Bhatia et al., 2022)           | India           | Cohort study       | 15             | NS          | PROMs, ROM, VAS, complications | 2D       | 58%     |
| Bilgin et al. 2012 (Bilgin and Armangil, 2012)     | Turkey          | Case study         | 11             | 2002 – 2009 | Complications                  | 2D       | 58%     |
| Buijze et al. 2012 (Buijze et al., 2012)           | NS              | Case study         | 18             | 1998 – 2009 | PROMs, ROM, VAS, complications | 2D       | 67%     |
| Buijze et al. 2018 (Buijze et al., 2018)           | USA & Europe    | RCT                | 17 2D<br>20 3D | 2010 – 2015 | PROMs, ROM, VAS, complications | Both     | 100%    |
| Capo et al. 2010 (Capo et al., 2010)               | USA             | Case study         | 13             | 2004 – 2007 | PROMs, ROM, complications      | 2D       | 67%     |
| Cha et al. 2021 (Cha et al., 2021)                 | South-Korea     | Case study         | 13             | 2000 – 2018 | PROMs, VAS, complications      | 2D       | 75%     |
| Delclaux et al. 2016 (Delclaux et al., 2016)       | France          | Case study         | 12             | 2005 – 2012 | PROMs, ROM, VAS, complications | 2D       | 42%     |
| De Oliveira et al. 2012 (de Oliveira et al., 2012) | Brazil          | Case study         | 20             | 2002 – 2009 | ROM, VAS, complications        | 2D       | 50%     |
| Dobbe et al. 2021 (Dobbe et al., 2021)             | The Netherlands | Cohort study       | 10             | 2017 – 2019 | VAS, complications             | 3D       | 83%     |

|                                                    |                       |              |    |             |                                |    |      |
|----------------------------------------------------|-----------------------|--------------|----|-------------|--------------------------------|----|------|
| Estermann et al. 2022 (Estermann et al., 2022)     | Switzerland           | Case study   | 14 | 2012 – 2020 | PROMs, ROM, VAS, complications | 3D | 67%  |
| Elmi et al. 2014 (Elmi et al., 2014)               | Iran                  | Case study   | 14 | 2005 – 2011 | ROM, VAS, complications        | 2D | 42%  |
| Fok et al. 2015 (Fok et al., 2015)                 | Switzerland           | Case study   | 12 | 2003 – 2011 | ROM, complications             | 2D | 33%  |
| Gaspar et al. 2017 (Gaspar et al., 2017)           | NS                    | Case study   | 39 | 2008 – 2014 | PROMs, VAS, complications      | 2D | 67%  |
| Gradl et al. 2013 (Gradl et al., 2013)             | NS                    | Case study   | 18 | 1999 - 2007 | PROMs, VAS, complications      | 2D | 67%  |
| Haghverdian et al. 2019 (Haghverdian et al., 2019) | USA                   | Case study   | 60 | 2007 – 2015 | Complications                  | 2D | 92%  |
| Hsieh et al. 2010 (Hsieh et al., 2010)             | China                 | Case study   | 12 | 2002 – 2007 | PROMs                          | 2D | 50%  |
| Huang et al. 2019 (Huang et al., 2019)             | Taiwan                | Case study   | 10 | 2014 – 2016 | PROMs, VAS, complications      | 2D | 42%  |
| Izmalkov et al. 2022 (Izmalkov et al., 2022)       | Russia                | Case study   | 32 | 2008 – 2018 | PROMs, VAS, complications      | 2D | 83%  |
| Kilic et al. 2011 (Kiliç et al., 2011)             | Turkey                | Cohort study | 17 | 2005 – 2009 | PROMs, ROM, complications      | 2D | 92%  |
| Konul et al. 2012 (Konul and Krimmer, 2012)        | NS                    | Case study   | 19 | 2005 – 2008 | PROMs, ROM                     | 2D | 92%  |
| Lee et al. 2022 (Lee et al., 2022)                 | South-Korea           | Case study   | 22 | 2006 – 2018 | PROMs, complications           | 2D | 83%  |
| Lozano et al. 2010 (Lozano-Calderón et al., 2010)  | The Netherlands & USA | Case study   | 22 | 1980 – 2000 | PROMs, ROM                     | 2D | 100% |
| Mahmoud et al. 2012 (Mahmoud et al., 2012)         | Egypt                 | Cohort study | 19 | 2004 – 2009 | PROMs, ROM, VAS, complications | 2D | 83%  |
| Michielsen et al. 2018 (Michielsen et al., 2018)   | Belgium               | Cohort study | 30 | 2009 – 2014 | PROMs, ROM, VAS, complications | 3D | 50%  |

|                                                 |                 |              |                       |             |                                |    |     |
|-------------------------------------------------|-----------------|--------------|-----------------------|-------------|--------------------------------|----|-----|
| Miyake et al. 2011 (Miyake et al., 2011)        | Japan           | Case study   | 10                    | 2008 – 2009 | ROM, complications             | 3D | 75% |
| Miyake et al. 2012 (Miyake et al., 2012)        | Japan           | Cohort study | 20; 13 ≥ 16y          | 2002 – 2009 | ROM, complications             | 3D | 58% |
| Mulders et al. 2017 (Mulders et al., 2017)      | The Netherlands | Case study   | 48                    | 2009 – 2016 | PROMs, ROM, VAS, complications | 2D | 83% |
| Oka et al. 2017 (Oka et al., 2018)              | Japan           | Case study   | 28                    | 2003 – 2013 | Complications                  | 3D | 92% |
| Oka et al. 2019 (Oka et al., 2019)              | Japan           | Cohort study | 16; 11 forearm        | 2015 – 2017 | PROMs, ROM, VAS, complications | 3D | 83% |
| Opel et al. 2013 (Opel et al., 2014)            | UK              | Case study   | 20                    | NS          | PROMs, ROM, complications      | 2D | 58% |
| Ozasa et al. 2013 (Ozasa et al., 2013)          | Japan           | Case study   | 19                    | 2000 – 2010 | PROMs                          | 2D | 83% |
| Pace et al. 2021 (Pace et al., 2021)            | Italy           | Case study   | 32                    | NS          | PROMs, ROM, VAS, complications | 2D | 83% |
| Park et al. 2012 (Park et al., 2012)            | South-Korea     | Case study   | 14                    | 2001 – 2008 | ROM, VAS, complications        | 2D | 83% |
| Pecache et al. 2021 (Pecache and Calleja, 2020) | Philippines     | Case study   | 13                    | NS          | PROMs                          | 2D | 42% |
| Pillukat et al. 2013 (Pillukat et al., 2013)    | Germany         | Cohort study | 34                    | 1999 – 2004 | PROMs, ROM, VAS                | 2D | 67% |
| Pillukat et al. 2014 (Pillukat et al., 2014)    | Germany         | Cohort study | 17                    | 1992 – 2003 | PROMs, ROM, VAS                | 2D | 67% |
| Pillukat et al. 2018 (Pillukat et al., 2018)    | Germany         | Cohort study | 19; 15 with follow-up | 2013 – 2016 | PROMs, ROM, VAS, complications | 2D | 75% |
| Robinson et al. 2021 (Robinson et al., 2022)    | USA             | Case study   | 12                    | 2016 – 2019 | ROM, complications             | 2D | 50% |
| Roner et al. 2020 (Roner et al., 2020)          | Switzerland     | Case study   | 37                    | 2008 – 2016 | ROM, complications             | 3D | 50% |

|                                                  |                 |              |    |             |                                |    |      |
|--------------------------------------------------|-----------------|--------------|----|-------------|--------------------------------|----|------|
| Rothenfluh et al. 2013 (Rothenfluh et al., 2013) | Switzerland     | Case study   | 22 | 1999 – 2009 | PROMs, ROM, VAS, complications | 2D | 67%  |
| Schurko et al. 2020 (Schurko et al., 2020)       | USA             | Case study   | 53 | 2005 – 2017 | PROMs, complications           | 2D | 100% |
| Shintani et al. 2018 (Shintani et al., 2018)     | Japan           | Case study   | 19 | NS          | ROM, complications             | 3D | 50%  |
| Singh et al. 2022 (Singh et al., 2022)           | Switzerland     | Case study   | 15 | 2008 – 2015 | PROMs, ROM, VAS, complications | 3D | 75%  |
| Stirling et al. 2020 (Stirling et al., 2020)     | UK              | Case study   | 89 | 2010 – 2018 | PROMs, complications           | 2D | 83%  |
| Tarallo et al. 2014 (Tarallo et al., 2014)       | Italy           | Cohort study | 20 | 2005 – 2012 | PROMs, ROM, VAS, complications | 2D | 75%  |
| Tiren et al. 2014 (Tiren and Vos, 2014)          | The Netherlands | Case study   | 11 | 2009 – 2011 | PROMs, ROM, complications      | 2D | 92%  |
| Wu et al. 2017 (Wu, 2017)                        | Taiwan          | Case study   | 41 | 2005 – 2014 | PROMs, ROM, complications      | 2D | 75%  |
| Zhang et al. 2022 (Zhang et al., 2022)           | China           | Case study   | 17 | 2016 – 2018 | PROMs, complications           | 2D | 83%  |

RCT: Randomized Controlled Trial; PROMs: Patient-Reported Outcome Measurements; ROM: Range of motion; VAS: Visual analogue scale for pain; NS: Not stated
