# Supplementary material for: Functional outcome of 2-D- and 3-D-guided corrective forearm osteotomies: a systematic review
Source: PubMed Central journal article supplement (PMC11264531; doi:10.1177/17531934231201962), 2023-09-25
Supplement: sj-pdf-4-jhs-10.1177_17531934231201962.pdf [file sj-pdf-4-jhs-10.1177_17531934231201962.pdf]

Online Table S3: Quality assessment according to the McMaster score, part one.

| Categories                                                  | Aibinder, 2018 | Andreasson, 2020 <sup>1</sup> | Andreasson, 2020 <sup>2</sup> | Athlani, 2020 | Bauer, 2017 | Bhatia, 2020 | Bilgin, 2012 | Buijze, 2012 | Buijze, 2018 | Capo, 2010 | Cha, 2021 | Delclaux, 2016 | De Oliveira, 2012 | Dobbe, 2021 |
|-------------------------------------------------------------|----------------|-------------------------------|-------------------------------|---------------|-------------|--------------|--------------|--------------|--------------|------------|-----------|----------------|-------------------|-------------|
| <b>1. Study purpose</b>                                     |                |                               |                               |               |             |              |              |              |              |            |           |                |                   |             |
| Was the study question clearly stated?                      | 1              | 1                             | 1                             | 1             | 1           | 0            | 1            | 1            | 1            | 1          | 0         | 1              | 0                 | 1           |
| <b>2. Literature review</b>                                 |                |                               |                               |               |             |              |              |              |              |            |           |                |                   |             |
| Was relevant background literature reviewed?                | 1              | 1                             | 1                             | 0             | 0           | 1            | 0            | 0            | 1            | 1          | 1         | 0              | 1                 | 1           |
| <b>3. Study design</b>                                      |                |                               |                               |               |             |              |              |              |              |            |           |                |                   |             |
|                                                             | CC             | CS                            | RCT                           | C             | CC          | C            | CS           | CS           | RCT          | CS         | CS        | CS             | CS                | C           |
| <b>4. Sample</b>                                            |                |                               |                               |               |             |              |              |              |              |            |           |                |                   |             |
| Was the sample described in detail?                         | 1              | 1                             | 1                             | 0             | 1           | 1            | 1            | 1            | 1            | 0          | 1         | 0              | 1                 | 1           |
| Was the sample justified?                                   | 0              | 0                             | 0                             | 0             | 1           | 0            | 1            | 1            | 1            | 1          | 1         | 1              | 1                 | 1           |
| Were the groups randomized?                                 | 0              | 0                             | 1                             | 0             | 0           | 0            | 0            | 0            | 1            | 0          | 0         | 0              | 0                 | 0           |
| Was randomizing appropriate done?                           | N/A            | N/A                           | 1                             | N/A           | N/A         | N/A          | N/A          | N/A          | 1            | N/A        | N/A       | N/A            | N/A               | N/A         |
| <b>5. Outcomes</b>                                          |                |                               |                               |               |             |              |              |              |              |            |           |                |                   |             |
| Were the outcome measures reliable?                         | 0              | 1                             | 1                             | 1             | 0           | 1            | 1            | 1            | 1            | 1          | 1         | 1              | 1                 | 1           |
| Were the outcome measures valid?                            | 1              | 1                             | 1                             | 1             | 1           | 1            | 1            | 1            | 1            | 1          | 1         | 1              | 0                 | 1           |
| <b>6. Intervention</b>                                      |                |                               |                               |               |             |              |              |              |              |            |           |                |                   |             |
| Intervention was described in detail?                       | 1              | 1                             | 1                             | 1             | 1           | 1            | 0            | 1            | 1            | 1          | 1         | 1              | 1                 | 1           |
| Contamination was avoided?                                  | 1              | N/A                           | 1                             | N/A           | 1           | N/A          | N/A          | N/A          | 1            | N/A        | N/A       | N/A            | N/A               | N/A         |
| Cointervention was avoided?                                 | 1              | N/A                           | 1                             | N/A           | 1           | N/A          | N/A          | N/A          | 1            | N/A        | N/A       | N/A            | N/A               | N/A         |
| <b>7. Results</b>                                           |                |                               |                               |               |             |              |              |              |              |            |           |                |                   |             |
| Results were reported in terms of statistical significance? | 1              | 1                             | 1                             | 1             | 1           | 1            | 0            | 1            | 1            | 0          | 1         | 0              | 1                 | 1           |
| Were the analysis method/s appropriate?                     | 0              | 1                             | 1                             | 1             | 1           | 0            | 0            | 1            | 1            | 0          | 1         | 0              | 0                 | 1           |

|                                                               |    |    |    |    |    |    |    |    |     |    |    |    |    |    |
|---------------------------------------------------------------|----|----|----|----|----|----|----|----|-----|----|----|----|----|----|
| Clinical importance was reported?                             | 0  | 0  | 1  | 1  | 0  | 0  | 0  | 0  | 1   | 1  | 0  | 0  | 0  | 1  |
| Drop-outs were reported?                                      | 0  | 1  | 1  | 1  | 0  | 0  | 1  | 0  | 1   | 1  | 1  | 0  | 0  | 0  |
| 8. Conclusion                                                 |    |    |    |    |    |    |    |    |     |    |    |    |    |    |
| Conclusions were appropriate given study methods and results? | 0  | 0  | 1  | 0  | 1  | 1  | 1  | 0  | 1   | 0  | 0  | 0  | 0  | 0  |
| Total                                                         | 8  | 9  | 15 | 8  | 10 | 7  | 7  | 8  | 16  | 8  | 9  | 5  | 6  | 10 |
| %                                                             | 57 | 75 | 94 | 67 | 71 | 58 | 58 | 67 | 100 | 67 | 75 | 42 | 50 | 83 |

Yes = 1 point; No = 0 points; CC = Case Control study; CR = Case study; RCT = Randomised Controlled Trial; C = Cohort study; N/A = Not applicable

1: Andreasson et al. Long-term outcomes of corrective osteotomy for malunited fractures of the distal radius. *J Plast Surg Hand Surg.* 2020, 54: 94–100.

2: Andreasson et al. Functional outcome after corrective osteotomy for malunion of the distal radius: a randomised, controlled, double-blind trial. *Int Orthop.* 2020, 44: 1353–65.
