# Supplementary material for: Functional outcome of 2-D- and 3-D-guided corrective forearm osteotomies: a systematic review
Source: PubMed Central journal article supplement (PMC11264531; doi:10.1177/17531934231201962), 2023-09-25
Supplement: sj-pdf-6-jhs-10.1177_17531934231201962.pdf [file sj-pdf-6-jhs-10.1177_17531934231201962.pdf]

Online Table S5: Quality assessment according to the McMaster score, part three.

| Categories                                                  | Michielsens, 2018 | Miyake, 2011 | Miyake, 2012 | Mulders, 2017 | Oka, 2017 | Oka, 2019 | Opel, 2014 | Ozasa, 2013 | Pace, 2012 | Park, 2012 | Pecache, 2021 | Pillukat, 2013 | Pillukat, 2014 | Pillukat, 2018 |
|-------------------------------------------------------------|-------------------|--------------|--------------|---------------|-----------|-----------|------------|-------------|------------|------------|---------------|----------------|----------------|----------------|
| 1. Study purpose                                            |                   |              |              |               |           |           |            |             |            |            |               |                |                |                |
| Was the study question clearly stated?                      | 0                 | 1            | 0            | 1             | 1         | 1         | 1          | 0           | 1          | 1          | 0             | 1              | 1              | 1              |
| 2. Literature review                                        |                   |              |              |               |           |           |            |             |            |            |               |                |                |                |
| Was relevant background literature reviewed?                | 0                 | 1            | 0            | 1             | 0         | 0         | 1          | 1           | 1          | 0          | 1             | 0              | 0              | 1              |
| 3. Study design                                             | C                 | CS           | C            | CS            | CS        | C         | CS         | CS          | CS         | CS         | CS            | C              | C              | C              |
| 4. Sample                                                   |                   |              |              |               |           |           |            |             |            |            |               |                |                |                |
| Was the sample described in detail?                         | 1                 | 1            | 1            | 1             | 1         | 1         | 1          | 1           | 1          | 1          | 0             | 1              | 1              | 1              |
| Was the sample justified?                                   | 1                 | 1            | 1            | 1             | 1         | 1         | 0          | 1           | 0          | 1          | 0             | 1              | 1              | 0              |
| Were the groups randomized?                                 | 0                 | 0            | 0            | 0             | 0         | 0         | 0          | 0           | 0          | 0          | 0             | 0              | 0              | 0              |
| Was randomizing appropriate done?                           | N/A               | N/A          | N/A          | N/A           | N/A       | N/A       | N/A        | N/A         | N/A        | N/A        | N/A           | N/A            | N/A            | N/A            |
| 5. Outcomes                                                 |                   |              |              |               |           |           |            |             |            |            |               |                |                |                |
| Were the outcome measures reliable?                         | 1                 | 0            | 0            | 1             | 1         | 1         | 1          | 1           | 1          | 1          | 1             | 1              | 1              | 1              |
| Were the outcome measures valid?                            | 1                 | 0            | 0            | 1             | 1         | 1         | 1          | 1           | 1          | 1          | 0             | 1              | 1              | 1              |
| 6. Intervention                                             |                   |              |              |               |           |           |            |             |            |            |               |                |                |                |
| Intervention was described in detail?                       | 1                 | 1            | 1            | 0             | 1         | 1         | 0          | 1           | 1          | 1          | 1             | 1              | 1              | 1              |
| Contamination was avoided?                                  | N/A               | N/A          | N/A          | N/A           | N/A       | N/A       | N/A        | N/A         | N/A        | N/A        | N/A           | N/A            | N/A            | N/A            |
| Cointervention was avoided?                                 | N/A               | N/A          | N/A          | N/A           | N/A       | N/A       | N/A        | N/A         | N/A        | N/A        | N/A           | N/A            | N/A            | N/A            |
| 7. Results                                                  |                   |              |              |               |           |           |            |             |            |            |               |                |                |                |
| Results were reported in terms of statistical significance? | 0                 | 1            | 1            | 1             | 1         | 1         | 1          | 1           | 0          | 1          | 0             | 1              | 1              | 1              |

|                                                               |    |    |    |    |    |    |    |    |    |    |    |    |    |    |
|---------------------------------------------------------------|----|----|----|----|----|----|----|----|----|----|----|----|----|----|
| Were the analysis method/s appropriate?                       | 0  | 0  | 1  | 1  | 1  | 1  | 0  | 1  | 1  | 1  | 0  | 1  | 1  | 1  |
| Clinical importance was reported?                             | 0  | 1  | 1  | 0  | 1  | 1  | 0  | 1  | 1  | 1  | 0  | 0  | 0  | 1  |
| Drop-outs were reported?                                      | 1  | 1  | 1  | 1  | 1  | 1  | 1  | 1  | 1  | 1  | 1  | 0  | 0  | 0  |
| 8. Conclusion                                                 |    |    |    |    |    |    |    |    |    |    |    |    |    |    |
| Conclusions were appropriate given study methods and results? | 0  | 1  | 0  | 1  | 1  | 0  | 0  | 0  | 1  | 0  | 1  | 0  | 0  | 0  |
| Total                                                         | 6  | 9  | 7  | 10 | 11 | 10 | 7  | 10 | 10 | 10 | 5  | 8  | 8  | 9  |
| %                                                             | 50 | 75 | 58 | 83 | 92 | 83 | 58 | 83 | 83 | 83 | 42 | 67 | 67 | 75 |

Yes = 1 point; No = 0 points; CC = Case Control study; CR = Case study; RCT = Randomised Controlled Trial; C = Cohort study; N/A = Not applicable
