# Supplementary material for: Functional outcome of 2-D- and 3-D-guided corrective forearm osteotomies: a systematic review
Source: PubMed Central journal article supplement (PMC11264531; doi:10.1177/17531934231201962), 2023-09-25
Supplement: sj-pdf-7-jhs-10.1177_17531934231201962.pdf [file sj-pdf-7-jhs-10.1177_17531934231201962.pdf]

|                                                               |    |    |    |     |    |    |    |    |    |    |    |   |
|---------------------------------------------------------------|----|----|----|-----|----|----|----|----|----|----|----|---|
| Clinical importance was reported?                             | 0  | 0  | 1  | 1   | 0  | 1  | 1  | 1  | 1  | 0  | 1  | 0 |
| Drop-outs were reported?                                      | 1  | 1  | 1  | 1   | 1  | 1  | 1  | 1  | 1  | 1  | 1  |   |
| 8. Conclusion                                                 |    |    |    |     |    |    |    |    |    |    |    |   |
| Conclusions were appropriate given study methods and results? | 0  | 0  | 0  | 1   | 0  | 0  | 0  | 0  | 1  | 0  | 1  |   |
| Total                                                         | 6  | 6  | 8  | 12  | 6  | 9  | 10 | 9  | 11 | 9  | 10 |   |
| %                                                             | 50 | 50 | 67 | 100 | 50 | 75 | 83 | 75 | 92 | 75 | 83 |   |

points; CC = Case Control study; CR = Case study; RCT = Randomised Controlled Trial; C = Cohort study; N/A = Not applicable
