# Supplementary material for: Functional outcome of 2-D- and 3-D-guided corrective forearm osteotomies: a systematic review
Source: PubMed Central journal article supplement (PMC11264531; doi:10.1177/17531934231201962), 2023-09-25
Supplement: sj-pdf-8-jhs-10.1177_17531934231201962.pdf [file sj-pdf-8-jhs-10.1177_17531934231201962.pdf]

Online Table S7: Different types of complications for conventional and 3D-guided osteotomies.

| Complications                   | Conventional | 3D-guided |
|---------------------------------|--------------|-----------|
| Implant failure                 | 2.10%        | 1.97%     |
| Loss of the correction          | 0.82%        | 0.00%     |
| A revision corrective osteotomy | 1.40%        | 1.97%     |
| Tendon injuries                 | 2.10%        | 1.57%     |
| Nerve injuries                  | 0.93%        | 1.18%     |
| Infection                       | 1.05%        | 0.00%     |
| Nonunion                        | 2.45%        | 0.00%     |
